# Supplementary material for: Soziale Ungleichheit, sozialer Zusammenhalt und Gesundheit
Source: publisher site journal article supplement (doi:10.1515/pubhef-2018-0088), 2018-11-28
Supplement: Supplementary file 1 [file Supplement 1.docx]

**Supplement 1: Univariate Statistiken der untersuchten Merkmale**

| **Items/Skalen** | **weiblich** | **männlich** | Chi²-Test |
| --- | --- | --- | --- |
| Geschlecht | 48,6 % | 51,4 % |  |
| Alter <36 Jahre | 34,8 % | 28,6 % | 0,001 |
| Alter 36-55 Jahre | 56,5 % | 61,6 % |  |
| Alter >56 Jahre | 8,7 % | 9,8 % |  |
| Hochschulabschluss vorhanden | 15,8 % | 20,4 % | <0,001 |
| Hochschulabschluss nicht vorhanden | 84,2 % | 79,6 % |  |
| Finanzielle Situation schlecht/sehr schlecht | 13,4 % | 14,5 % | 0,002 |
| Finanzielle Situation durchschnittlich | 59,5 % | 54,4 % |  |
| Finanzielle Situation gut/sehr gut | 24,3 % | 27,2 % |  |
| Beruflicher Status Führungsposition | 7,7 % | 23,5 % | <0,001 |
| Beruflicher Status keine Führungsposition | 92,3 % | 76,5 % |  |
| Wohlbefinden hoch | 55,8 % | 53,0 % | <0,001 |
| Wohlbefinden niedrig | 44,2 % | 47,0 % |  |
| Sozialer Zusammenhalt hoch | 22,3 % | 20,5 % | 0,476 |
| Sozialer Zusammenhalt moderat | 55,7 % | 56,7 % |  |
| Sozialer Zusammenhalt schwach | 22,0 % | 22,9 % |  |
|  | **Mittelwert (Standardabweichung)** | |  |
|  | **weiblich** | **männlich** | **t-Test** |
| Wohlbefinden | 3,66 (0,72) | 3,78 (0,74) | <0,001 |
| Sozialer Zusammenhalt | 3,47 (0,64) | 3,50 (0,66) | 0,081 |

Die p-Werte zu den Chi² - bzw. T-Tests beziehen sich jeweils auf Unterschiede zwischen den Geschlechtern.
